**Full title (250 characters):**

**Design, optimization and validation of genes commonly used in  
expression studies on DMH/AOM rat colon carcinogenesis model**

**Short title (100 characters):**

**Validation of genes commonly used in qPCR studies on DMH/AOM rat  
colon carcinogenesis model**

David Bars-Cortina<sup>1,2</sup>, Antoni Riera<sup>3</sup>, Gemma Gou<sup>4,5</sup>, Carme Piñol-Felis<sup>2 \*</sup>,  
Maria-José Motilva<sup>1</sup>

<sup>1</sup> Food Technology Department, XaRTA-TPV, Agrotecnio Center, Escola Tècnica  
Superior d'Enginyeria Agrària, Universitat de Lleida, Avinguda Alcalde Rovira Roure  
191, 25198 Lleida, Catalonia, Spain

<sup>2</sup> Department of Medicine, Universitat de Lleida-Institut de Recerca Biomèdica de  
Lleida (IRBLleida), Avinguda Alcalde Rovira Roure 80, 25198 Lleida, Catalonia,  
Spain.

<sup>3</sup> Andrology Department, Fundació Puigvert, Universitat Autònoma de Barcelona,  
Instituto de Investigaciones Biomédicas Sant Pau (IIB-Sant Pau), Barcelona,  
Catalonia, Spain.

<sup>4</sup> Molecular Physiology of the Synapse Laboratory, Biomedical Research Institute  
Sant Pau (IIB Sant Pau), Sant Antoni M<sup>a</sup> Claret 167, 08025 Barcelona, Spain.

<sup>5</sup> Universitat Autònoma de Barcelona, 08193, Bellaterra, Cerdanyola del Vallès,  
Spain

\*Corresponding author:

Email: [pinyol@medicina.udl.cat](mailto:pinyol@medicina.udl.cat) (CP-F)

## Abstract

Colorectal cancer (CRC), also known as colon cancer, is the third most common form of cancer worldwide in men and the second in women and is characterized by several genetic alterations, among them the expression of several genes. 1,2-dimethylhydrazine (DMH) and its metabolite azoxymethane (AOM) are procarcinogens commonly used to induce colon cancer in rats (DMH/AOM rat model). This rat model has been used to study changes in mRNA expression in genes involved in this pathological condition. However, a lack of proper detailed PCR primer design in the literature limits the reproducibility of the published data.

The present study aims to design, optimize and validate the qPCR, in accordance with the MIQE (Minimum Information for Publication of Quantitative Real-Time PCR Experiments) guidelines, for seventeen genes commonly used in the DMH/AOM rat model of CRC (*Apc*, *Aurka*, *Bax*, *Bcl2*, *β-catenin*, *Ccnd1*, *Cdkn-1A*, *Cox2*, *Gsk3beta*, *IL-33*, *iNOs*, *Nrf2*, *p53*, *RelA*, *Smad4*, *Tnfa* and *Vegfa*) and two reference genes (*Actb* or *β-actin* and *B2m*). The specificity of all primer pairs was empirically validated on agarose gel, and furthermore, the melting curve inspection was checked as was their efficiency (%) ranging from 90 to 110 with a correlation coefficient of  $r^2 > 0.980$ . Finally, a pilot study was performed to compare the robustness of two candidate reference genes.

## Introduction

Colorectal cancer (CRC) is the third most common form of cancer worldwide in men (surpassed by lung and prostate cancer) and the second in women (overtaken by breast cancer). The incidence of CRC varies significantly between populations, Australia and New Zealand being the countries with the highest rate of new diagnoses, while the countries of western Africa have the lowest incidence[1]. In the United States, CRC represents the fourth most prevalent cancer with 135,430 new cases diagnosed in 2017 and representing 8.0% of all new cancer cases[2]. In Europe, CRC is the second most common cancer in both sexes[3]. In Asia, especially in the industrialized regions, the incidence of CRC has increased over the last decade due to the adoption of the western lifestyle[4]. Interestingly, a similar situation is taking place in Eastern Europe, Latin America and the Caribbean countries[5]. Unfortunately, the global incidence of CRC is expected to increase by about 60% and it is predicted that, in 2030, more than 2.2 million new cases will be diagnosed and 1.1 million people will die from this disease[5].

It is well established that lifestyle and especially eating patterns play an important role in the risk of developing cancer in the digestive tract[6–9]. Hence, several studies have focused on diet as the major strategy to counteract and prevent colon cancer[10]. Different animal models have been used to evaluate the effect of food components on colon cancer prevention. Such models of colon carcinogenesis can be divided into two broad categories: transgenic and chemically-induced [11,12]. A classic example of a transgenic animal CRC model concerns adenomatous polyposis coli (*Apc*) gene mutations. Nevertheless, these animal models have been generated to

study familial adenomatous polyposis (FAP) and hereditary nonpolyposis colorectal cancer (HNPCC) syndromes which only account for approximately 5% of all cases [11,12].

Dimethylhydrazine (DMH) and its metabolite azoxymethane (AOM) are frequently used to generate chemically-induced models for CRC[11,13]. These models share many similarities with human sporadic colon cancer since DMH/AOM colon carcinogenesis occurs as a multistep process. The stepwise development of CRC from dysplastic crypts, adenomas to carcinomas provides the opportunity to investigate and identify molecular alterations in each stage of tumour development[11]. Interestingly, genes that have been found mutated in human sporadic colon cancer have also been found to mutate in DMH/AOM-induced colon carcinogenesis[11]. Nutrigenomics, the study of the effects of food components on gene expression, is a broad approach used in CRC animal models. In this regard, a wealth of data addresses this issue through different dietary regimes (more than 100 results appear when searching for “rat colon cancer diet gene expression” in Pubmed). However, the data generated is often confusing when it is carefully evaluated. For instance, in some published articles, the accession number of the reference sequence used is not indicated or the qPCR is not well designed or described (i.e. the primer sequence is missing or contains mistakes, primers are not specific or the melting temperature is too low). On the basis of the aforementioned data, in this study we provide a well-designed and described qPCR protocol according to the MIQE (Minimum Information for Publication of Quantitative Real-Time PCR Experiments) guidelines[14] for 17 genes routinely studied in DMH/AOM CRC rat model.

Moreover, we also analyse two reference genes commonly used in this carcinogenesis model.

## Materials and Methods

### Animals

All animal care and experimental procedures were in accordance with the EU Directive 2010/63/EU guidelines for animal experiments and approved by the Animal Ethics Committee at the University of Lleida (CEEA 02/06-16). Healthy adult male Wistar rats weighing between 200 to 250 g maintained in the animal facilities at the University of Lleida were used. The animals were housed in polyvinyl cages at a controlled temperature ( $21^{\circ}\text{C} \pm 1^{\circ}\text{C}$ ) and humidity ( $55\% \pm 10\% \text{ RH}$ ), maintained under a constant 12 h light-dark cycle. All the animals were fed with water and a standard diet for rodents (Envigo Teklad Global Diet 2014, batch 3201, Settimo Milanese, Italy) *ad libitum*. Three randomly-selected animals were sacrificed by intracardiac puncture after isoflurane anaesthesia (ISOFlo, Veterinaria Esteve, Bologna, Italy). Distal colon tissue (the most relevant region in CRC studies with DMH/AOM induced models)[13] was extracted and immediately frozen in liquid nitrogen and then stored at  $-80^{\circ}\text{C}$  until it was analysed.

### RNA isolation & cDNA synthesis

Tissue Lyser LT (Quiagen, Germany) was used as a tissue homogenizer (4 cycles of 50 Hz for 30 sec. with a 1 min. pause within each cycle). Total RNA was extracted using the Trizol™ Plus PureLink™ Kit RNA Mini Kit (Invitrogen,

USA) following the kit instructions. RNA quantity and purity (260/280 and 260/230 ratios) were assessed with a ND-1000 Nanodrop spectrophotometer (ThermoFisher Scientific, USA). Furthermore, the integrity of the total RNA obtained was evaluated through 1% agarose gel[15]. In all cases, 18S and 28S ribosomal RNA bands were clearly detected and no degraded RNA (illustrated as smear in the gel lane) was identified.

Reverse transcription was performed with the Maxima H Minus First Strand cDNA Synthesis kit with dsDNase (ThermoFisher Scientific, USA) according to the manufacturer's instructions ( $\leq 5 \mu\text{g}$  of total RNA as template and using 100 pmol random hexamer primer).

### Primer pairs design

Primer pairs for seventeen different CRC related genes (*Apc*, *Aurka*, *Bax*, *Bcl2*,  $\beta$ -catenin, *Ccnd1*, *Cdkn1a*, *Cox2*, *Gsk3beta*, *IL-33*, *iNOs*, *Nrf2*, *p53*, *RelA*, *Smad4*, *Tnfa* and *Vegfa*) and two candidate reference genes (*Actb* and *B2m*) were designed and evaluated for their suitability through a number of bioinformatics tools summarized in **Fig 1A**. Briefly, we selected the genes to be studied (from a literature search) and obtained their accession number. Then, the nucleotide sequence was retrieved from the PubMed Nucleotide database. Afterwards, if no previously published primers were used, we checked for their splice variants (through Ensembl Release 87)[16]. In the case of spliced genes and also in order to avoid the presence of SNPs (single-nucleotide polymorphisms), multiple sequence alignment was performed to find common regions within the splice variants.[16] The selected sequence was transferred to Primer3Plus software version 2.4.2[17] to pick

up primers. The technical parameters used in the design of the primers were based on Thorton et al. 2011[18]. Finally, the primer pairs obtained were submitted to further *in silico* analysis in order to avoid strong primer secondary structures (through OligoAnalyzer 3.1, Integrated DNA Technologies)[19], robust amplicon secondary structures (with the UNAFold tool, Integrated DNA Technologies)[19] and unspecificity (with the In-Silico PCR tool of the UCSC Genome Browser Database[20] and the Nucleotide BLAST tool[21]). The primer pairs selected after these bioinformatics tool tests were acquired from the Sigma-Aldrich custom oligo facilities (Haverhill, UK).

**Fig 1.** Flowchart indicating the strategy followed to design and validate the candidate primers.

(A) *In silico* validation flowchart. (B) Empirical validation flowchart.

## PCR

### PCR reaction

PCR reactions were performed in a total reaction volume of 25 µl comprising 2.5 µl of 10X Dream Taq Buffer, 0.5 µl of dNTP mix (R0191 ThermoFisher Scientific, USA), 0.5 µl of gene-specific primer pair at 10 µM, 2 µl of cDNA template, 0.625 U Dream Taq DNA Polymerase (EP0701 ThermoFisher Scientific, USA) and filled up to 25 µl with nuclease free water (BP561-1 Fisher Scientific, USA). The PCR conditions used were 3 min of polymerase activation at 95°C followed by 35 cycles of denaturation at 95°C for 30s, an annealing step at 57°C (or between 51°C and 61°C in the case of a

gradient) for 30s and extension at 72°C for 30s. Final extension (72°C) was performed for 5 min followed by an infinite 4°C step.

## PCR empirical validation

After the previous *in silico* steps described above, all the primer pairs were submitted to further analysis (**Fig 1B**). Primer specificity was assessed through conventional PCR followed by agarose gel electrophoresis in order to check that unique band with the amplicon size was obtained. The annealing temperature was set at 57°C by default but, in some cases, an annealing temperature gradient was needed (see above).

## qPCR

### qPCR reaction

Real-time PCR reactions were performed in a total reaction volume of 20 µl comprising 10 µl of SYBR™ Select Master Mix (2X) (ThermoFisher Scientific, USA), 0.2 to 0.8 µl of each gene-specific primer (depending on the primer pairs concentration required) (**Table 1**), 2 µl of cDNA, and filled up to 20 µl with nuclease free water (BP561-1 Fisher Scientific, USA).



**Table 1.** qPCR efficiency and correlation coefficient ( $R^2$ ) obtained for each selected gene.

| Gene (Accession No.)                             | Linearity range in ng cDNA<br>(Ta: annealing temperature) | qPCR<br>efficiency | $R^2$          | [primer], nM |
|--------------------------------------------------|-----------------------------------------------------------|--------------------|----------------|--------------|
| <b>Actb</b> *<br>(NM_031144.3)                   | 2 to 128 (Ta: 57°C)<br>22.5 to 114 (Ta: 59.3°C)           | 108.9%<br>90.5%    | 0.998<br>0.999 | 100          |
| <b>Apc</b><br>(NM_012499.1)                      | 2 to 128                                                  | 108.5%             | 0.998          | 100          |
| <b>Aurka</b><br>(NM_153296.2)                    | 9 to 243                                                  | 108.8%             | 0.998          | 200          |
| <b>Bax</b><br>(NM_017059.2)                      | 0.16 to 100                                               | 106.3%             | 0.994          | 200          |
| <b>Bcl2</b><br>(NM_016993.1)                     | 0.5 to 128                                                | 102.9%             | 0.990          | 200          |
| <b>B2m</b> *<br>(NM_012512.2)                    | 1.6 to 148.8 (Ta:57°C)<br>2 to 128 (Ta:59.3°C)            | 100.4%<br>108.7%   | 0.996<br>0.997 | 200          |
| <b><math>\beta</math>-catenin</b><br>(AF_121265) | 2 to 128                                                  | 109.8%             | 0.980          | 150          |
| <b>Ccnd1</b><br>(NM_1719924)                     | 22.5 to 114                                               | 108.5%             | 0.997          | 100          |
| <b>Cdkn-1A</b><br>(NM_080782.3)                  | 0.16 to 100                                               | 101.2%             | 0.994          | 200          |
| <b>Cox2</b><br>(AF233596.1)                      | 0.5 to 100                                                | 106.6%             | 0.998          | 200          |
| <b>Gsk3beta</b><br>(NM_032080)                   | 1.56 to 100                                               | 106.8%             | 0.997          | 200          |
| <b>IL-33</b><br>(NM_001014166.1)                 | 2 to 128                                                  | 110.0%             | 0.996          | 100          |
| <b>iNOs</b><br>(NM_012611.3)                     | 20 to 338.8                                               | 97.0%              | 0.990          | 200          |
| <b>Nrf2</b><br>(NM_031789.2)                     | 0.16 to 100                                               | 106.6%             | 0.996          | 200          |
| <b>p53</b><br>(NM_030989.3)                      | 8 to 128                                                  | 102.6%             | 0.997          | 100          |
| <b>RelA</b><br>(NM_199267.2)                     | 0.16 to 100                                               | 103.0%             | 0.997          | 200          |
| <b>Smad4</b><br>(AB010954.1)                     | 6.4 to 100                                                | 104.5%             | 0.993          | 400          |
| <b>Tnfa</b><br>(NM_012675.3)                     | 10 to 114                                                 | 90.9%              | 0.987          | 100          |
| <b>Vegfa</b><br>(ENSRNOG00000019598)             | 0.16 to 100                                               | 106.9%             | 0.992          | 200          |

202 \* denotes reference gene. nM: nanomolar concentration

The qPCR reactions were carried out on a Bio-Rad CFX96 real-time PCR system (Bio-Rad Laboratories, USA) under the following conditions: 2 min of uracil-DNA glycosylase (UDG) activation at 50°C, 2 min of polymerase activation at 95°C, followed by 40 cycles of denaturation at 95°C for 15 s and annealing/extension at the corresponding annealing temperature (57°C or 59.3°C) (**Table 2**) for 1 min. A melting curve analysis was done immediately after the qPCR analysis.

**Table 2.** List of the primer pairs validated.

| Gene (Accession No.)                 | Primer sequences (5'-3')                                 | Amplicon size | Ta               | Reference     |
|--------------------------------------|----------------------------------------------------------|---------------|------------------|---------------|
| <b>Actb *</b><br>(NM_031144.3)       | F: TCTGTGTGGATTGGTGGCT<br>R: TCATCGTACTCCTGCTTGCT        | 80 bp         | 57°C /<br>59.3°C | In-house      |
| <b>Apc</b><br>(NM_012499.1)          | F: ACTCCTTACTGCTTCTCACG<br>R: GTCCTTACTTTCTTTGCCCTTT     | 114 bp        | 57°C             | In-house      |
| <b>Aurka</b><br>(NM_153296.2)        | F: AGTGCTATCTGTCCATCAACC<br>R: ACCCGCATTTCCAGTCATCT      | 98 bp         | 59.3°C           | In-house      |
| <b>Bax</b><br>(NM_017059.2)          | F: AGAGGATGATTGCTGATGTGG<br>R: CCCAGTTGAAGTTGCCGT        | 93 bp         | 57°C             | In-house      |
| <b>Bcl2</b><br>(NM_016993.1)         | F: GATTGTGGCCTTCTTTGAG<br>R: CAGGCTGAGCAGCGTCTTC         | 232 bp        | 59.3°C           | Based on [31] |
| <b>B2m *</b><br>(NM_012512.2)        | F: CCCACCCTCATGGCTACTTC<br>R: GATGAAAACCGCACACAGGC       | 157 bp        | 57°C /<br>59.3°C | [32]          |
| <b>β-catenin</b><br>(AF_121265.1)    | F: CAAGTGGGTGGCATAGAGG<br>R: ATGACGAAGAGCACAGATGG        | 93 bp         | 57°C             | In-house      |
| <b>Ccnd1</b><br>(NM_171992.4)        | F: AGTTGCTGCAAATGGAAGT<br>R: TGGAGAGGAAGTGTTGCGATG       | 93 bp         | 57°C             | Based on [33] |
| <b>Cdkn-1A</b><br>(NM_080782.3)      | F: ATGTCCGATCCTGGTGATGT<br>R: GCTCAACTGCTCACTGTCCA       | 90 bp         | 57°C             | In-house      |
| <b>Cox2</b><br>(AF233596.1)          | F: TGTATGCTACCATCTGGCTTCGG<br>R: GTTTGGAACAGTCGCTCGTCATC | 94 bp         | 57°C             | [34]          |
| <b>Gsk3beta</b><br>(NM_032080.1)     | F: TGGGTCAATTTGGTGTGGT<br>R: GGTTCTTAAATCGCTTGCTCT       | 95 bp         | 57°C             | In-house      |
| <b>IL-33</b><br>(NM_001014166.1)     | F: TTCAGTCCTGCCCTTTCCTT<br>R: TGTGGTGCGTGCTCTTCT         | 84 bp         | 57°C             | In-house      |
| <b>iNOs</b><br>(NM_012611.3)         | F: CACCACCCTCCTTGTTCAAC<br>R: CAATCCACAACCTCGCTCCAA      | 132 bp        | 57°C             | [35]          |
| <b>Nrf2</b><br>(NM_031789.2)         | F: GTGACTCGGAAATGGAAGAG<br>R: AGAAGAATGTGTTGGCTGTG       | 83 bp         | 57°C             | In-house      |
| <b>p53</b><br>(NM_030989.3)          | F: GCAGAGTTGTTAGAAGGC<br>R: TTGAGAAGGGACGGAAGA           | 138 bp        | 57°C             | In-house      |
| <b>RelA</b><br>(NM_199267.2)         | F: TCACCAAAGACCCACCTCA<br>R: GTTCAGCCTCATAGAAGCCA        | 81 bp         | 57°C             | In-house      |
| <b>Smad4</b><br>(AB010954.1)         | F: CCACCAACTTCCCCAACATT<br>R: TGCAGTCCTACTTCCAGTCCAG     | 191 bp        | 57°C             | [36]          |
| <b>Tnfa</b><br>(NM_012675.3)         | F: ACCACGCTCTTCTGTCTACTG<br>R: CTTGGTGGTTTGCTACGAC       | 169 bp        | 59.3°C           | [37]          |
| <b>Vegfa</b><br>(ENSRNOG00000019598) | F: GACACACCCACCCACATAC<br>R: TCCAGTGAAGACACCAATAACA      | 141 bp        | 57°C             | In-house      |

\* denotes reference gene. Ta, annealing temperature

## qPCR empirical validation & qPCR analysis

Once the unique band had been obtained in the previous PCR step, qPCR efficiency, linearity and specificity (unique and clear melt curve) were assessed taking into account Taylor et al. 2010[22], and therefore the MIQE guidelines[14]. qPCR must be within a range of 90 to 110% and with a standard curve correlation coefficient ( $R^2 \geq 0.98$ [22,23]. Each point on the standard curve was performed in triplicate and covered all potential template concentrations that may be encountered in future studies. Whenever possible, the standard curve comprised three orders of magnitude.  $C_q$  values  $> 38$  were not considered for data analysis due their low efficiency[14]. Furthermore, in triplicate, no template control (NTC) was included for each primer pair in every run. The data resulting from the qPCR were analysed using the Bio-Rad CFX Maestro 1.1 software. Baseline correction and threshold setting were performed using the automatic calculation in the CFX Maestro 1.1 software (Bio-Rad).

## Reference gene selection

In parallel to the primer validation described in this paper, we implemented a related experiment with the aim of addressing the possible effect of dietary supplementation with a particular fruit (white- and red-fleshed apples) and cyanidin galactoside (the main anthocyanin in red-fleshed apple) on these genes in the early phases of rat colon cancer induced by AOM (**S1**

**Appendix**). For this reason, two reference genes commonly used in DMH/AOM rat model experiments were selected and submitted to check their expression stability in the different experimental groups in the related experiment cited above. In detail, six different experimental groups were compared and two rats per treatment group were analysed with three technical replicates each. The amount of cDNA used in each reaction was 100 ng.

The stability (aptitude) of the candidate reference genes was evaluated with two software tools (web-based RefFinder platform (<http://leonxie.esy.es/RefFinder/> [data access: 08/05/2018]) and Bio-Rad CFX Maestro 1.1. software, based on geNorm algorithm).

## **RESULTS AND DISCUSSION**

### **Genetic material used**

As stated in the previous section, three healthy adult male Wistar rats were selected randomly and sacrificed. The distal region of the colon was obtained and immediately frozen. The distal colon samples were pooled prior to total RNA extraction. The quality and quantity of the RNA was good (ratio 260/280 = 1.96, ratio 260/230= 2.09, 423.6 ng/μl).

### ***Primer design and validation through agarose gel***

A correct selection of the primer pairs is a critical step for a qPCR experiment in order to obtain a specific amplification of the target gene. In addition, the primer design for SYBR® Green based detection needs to be

more carefully done than for a classic TaqMan® assay since former interacts with double-stranded PCR products and may lead to “false” signal. Hence, the sensitivity of detection with SYBR® Green may be hindered by the lack of specificity of the primers, primer concentration and the formation of secondary structures in the PCR product. The formation of primer-dimers may register false positive fluorescence. However, this can easily be overcome by running a PCR melting curve analysis. As shown in **Fig 1**, all precautions were taken into account in this study.

The primer pairs detailed in **Table 2** passed all the bioinformatic tests (OligoAnalyzer 3.1 and UNAFold from Integrated DNA Technologies; in-silico PCR of the UCSC Genome Browser Database and the Nucleotide Blast tool) and a single band was observed in the agarose gel. These primers were selected for further analysis through qPCR. On the contrary, the primers which do not pass some step in the validation process are shown in **S1 Table**. The majority of the primer pairs (12, if we also consider the reference genes) were in-house designed. The remainder were from published intact sequences or, in some cases, were obtained after some *in silico* mismatch corrections (indicated as “Based on” in **Table 2 and S1 Table**).

### ***Primer validation through qPCR***

In order to check whether the primers pairs designed were useful for qPCR analysis, we need to validate primer specificity again through the melting curve and also the qPCR assay, mainly qPCR efficiency, as stated in Derveaux et al. and Taylor et al. [15,22]. One of the most common options to assess the specificity of the primer pairs is the melting curve. This determines

whether the intercalating dye (SYBR green) has produced single and specific products. In this study we checked the melting curve for all the primer pairs and these all demonstrated their specificity as a unique peak was detected among the concentrations used in the standard curve in all cases. Therefore, no interfering and unspecific peaks were detected.

The determination of the efficiency of a qPCR should be among the first things to do when setting up a qPCR assay. The efficiency of a qPCR reaction is defined as the ability of the polymerase reaction to convert reagents (dNTPs, oligos and template cDNA) into amplicon. Ideally, an efficient qPCR reaction achieves a twofold increase in amplicon per cycle[22]. In detail, PCR amplification efficiency must be established by means of standard curves and is determined from the slope of the log-linear portion of the calibration curve[14]. qPCR efficiency values must be within a range from 90 to 110% and with a standard curve correlation coefficient ( $R^2$ )  $\geq 0.98$ [22,23]. As can be seen in **Table 1**, the efficiency of all the primer pairs designed ranged from 90.5% to 109.8% with an  $R^2$  ranging from 0.980 to 0.999, which fulfils the requirements previously defined. Furthermore, repeatability and reproducibility has been assessed (**Fig 2**).

**Fig 2.** Intra-assay (repeatability) and inter-assay (reproducibility) precision of the validated genes.

In addition, the two reference genes demonstrated their ability to work properly at the two annealing temperatures ( $T_a$ ) used. This feature is

desirable in order to normalize the results in qPCR studies because the gene of interest and reference gene should share a common Ta.

Although in the vast majority of the literature focused mainly on PCR efficiency[15,22,24], the establishment of the limit of detection (LOD) is also recommended by the MIQE guidelines[14]. Although we did not address this issue specifically, we indirectly came up against it. In some cases (e.g. *Aurka* and *p53* gene), apart from no signal detected at concentrations lower than 5 ng cDNA, the absence of a fluorescence signal and/or anomalous C<sub>q</sub> variation was detected within technical replicates in these low concentrations. Accordingly, the lowest standard curve concentration was increased. These arrangements improved the qPCR efficiency without the need for an undesirable increase in the minimum cDNA concentration (note that rat distal colon is a rich source of total RNA and abundant tissue is available).

### **Pilot reference gene validation**

Normalizing the data by choosing the appropriate reference genes is fundamental for obtaining reliable results in reverse transcription-qPCR (RT-qPCR). This process enables different mRNA concentrations across different samples to be compared [14]. Normalization involves the use of stably expressed endogenous reference genes in relation to the expression levels of the gene(s) of interest. However, the expression levels of the reference genes may change between tissues and species and might be influenced by pathological conditions and therapies[25–27]. Hence, an inappropriate choice of reference genes could lead to erroneous interpretations of results [28]. Therefore, the selection and validation of the reference genes is a crucial step



before planning any expression analysis. In this study, we selected two reference genes commonly used in DMH/AOM rat model experiments (*β-actin* or *Actb* and *B2m*). To our knowledge, this is the first study to address the exploration of valid reference genes in rat colon tissue after dietary interventions (**S1 Appendix**).

As mentioned above, the two reference genes were submitted to the same tests summarized in **Fig 1** as the other seventeen genes of interest (*in silico* design, specificity through PCR, qPCR assay validation and specificity through melting curve analysis). Nevertheless, for the reference genes, one further step was done: to check their stability. As detailed previously in the Material and Methods section, rat colon tissue samples from a parallel dietary intervention in the AOM rat model experiment performed at the same time as this validation were used (**S1 Appendix**).

In order to calculate the stability of the reference gene between the different experimental treatments, we used two software tools: Bio-Rad CFX Maestro 1.1. software (based on geNorm algorithm[29]) and the output of the three software packages using the web-based RefFinder platform[30]. In general, the two reference genes studied presented an analogous pattern with good expression stability (M values<1.0) according to the geNorm algorithm, indicating excellent stability for both genes. Nevertheless, taking into account the RefFinder output (which considers the NormFinder and BestKeeper algorithms apart from the geNorm strategy) promotes the use of *B2m* towards to *Actb* gene. The gene with the lowest geomean value is viewed as the most stable reference gene. In detail, the software gave values of 1.19 and 1.41 for

*B2m* and *Actb* genes, respectively. Accordingly, although the differences were minimal, *B2m* was established as the more appropriate reference gene.

## Conclusions

qPCR is one of the methods of choice for gene expression analysis given its high sensitivity and because it works with very low nucleic acid concentrations. Nonetheless, there is a lack of qPCR validation information in the literature consulted. A lack of validation of the gene expression from the DMH/AOM rat model by qPCR is in line with the literature reviewed by Jacob et al. [27], who concluded that compliance with the MIQE guidelines continues to be an ongoing issue in the scientific community. Specifically, such essential information as the RNA integrity, the amount of cDNA, the linearity range and the efficiency of the qPCR is frequently missed.

In this study, with the aim of overcoming the lack of qPCR validation in the rodent CRC model, 17 rat genes related to human/rodent CRC were designed and validated following the MIQE guidelines[14,22]. Furthermore, two reference genes commonly used in colon cancer studies were tested for their stability. Overall, this study provides a detailed list of 17 primer pairs for rat-related human/rodent CRC genes and demonstrates the proper stability in dietary approaches in the rat CRC model of two reference genes frequently used in such studies.

## Acknowledgements

We sincerely thank Isabel Sánchez and M. Alba Sorolla (UdL SCT-Proteomics & Genomics Unit) for their advice on the empirical qPCR

validation performed. The lead author would like to express gratitude to its family and Dra. Cristina Falip Centellas, Dr. Francesc Pujol Aymerich and Dr. Josep M. Pericay Hosta for helping me to continue my PhD journey positively.

# **Literature cited**

1. International Agency for Research on Cancer. Fact Sheets by Cancer [Internet]. [cited 21 Mar 2018]. Available from: [http://globocan.iarc.fr/Pages/fact\\_sheets\\_cancer.aspx](http://globocan.iarc.fr/Pages/fact_sheets_cancer.aspx).
2. National Cancer Institute. Colorectal Cancer - Cancer Stat Facts [Internet]. [cited 21 Mar 2018]. Available from: <https://seer.cancer.gov/statfacts/html/colorect.html>.
3. Ferlay J, Steliarova-Foucher E, Lortet-Tieulent J, Rosso S, Coebergh JWW, Comber H, et al. Cancer incidence and mortality patterns in Europe: Estimates for 40 countries in 2012. *Eur J Cancer*. 2013; 49: 1374–1403. doi:10.1016/j.ejca.2012.12.027
4. Koo JH, Leong RWL, Ching J, Yeoh K-G, Wu D-C, Murdani A, et al. Knowledge of, attitudes toward, and barriers to participation of colorectal cancer screening tests in the Asia-Pacific region: a multicenter study. *Gastrointest Endosc*. 2012; 76: 126–135. doi:10.1016/j.gie.2012.03.168
5. Arnold M, Sierra MS, Laversanne M, Soerjomataram I, Jemal A, Bray F. Global patterns and trends in colorectal cancer incidence and mortality. *Gut*. 2017; 66: 683–691. doi:10.1136/gutjnl-2015-310912
6. Slattery ML, Boucher KM, Caan BJ, Potter JD, Ma KN. Eating patterns and risk of colon cancer. *Am J Epidemiol*. 1998; 148: 4–16. Available:

- 424 <http://www.ncbi.nlm.nih.gov/pubmed/9663397>
- 425 7. Pan P, Yu J, Wang L-S. Colon Cancer. Surg Oncol Clin N Am. 2018;  
426 27: 243–267. doi:10.1016/j.soc.2017.11.002
- 427 8. Kurotani K, Budhathoki S, Man Joshi A, Yin G, Toyomura K, Kono S, et  
428 al. Dietary patterns and colorectal cancer in a Japanese population: The  
429 Fukuoka Colorectal Cancer Study. Br J Nutr. 2010; 104: 1703–1711.  
430 doi:10.1017/S0007114510002606
- 431 9. Willett WC. Diet and health: what should we eat? Science 1994; 264:  
432 532–7.
- 433 10. Grosso G, Bella F, Godos J, Sciacca S, Del Rio D, Ray S, et al.  
434 Possible role of diet in cancer: systematic review and multiple meta-  
435 analyses of dietary patterns, lifestyle factors, and cancer risk. Nutr Rev.  
436 2017; 75: 405–419. doi:10.1093/nutrit/nux012
- 437 11. Perše M, Cerar A. Morphological and molecular alterations in 1,2  
438 dimethylhydrazine and azoxymethane induced colon carcinogenesis in  
439 rats. J Biomed Biotechnol. 2011; Vol. 2011: 473964.  
440 doi:10.1155/2011/473964
- 441 12. Femia A, Caderni G. Rodent Models of Colon Carcinogenesis for the  
442 Study of Chemopreventive Activity of Natural Products. Planta Med.  
443 2008; 74: 1602–1607. doi:10.1055/s-2008-1074577
- 444 13. Megaraj V, Ding X, Fang C, Kovalchuk N, Zhu Y, Zhang Q-Y. Role of  
445 hepatic and intestinal p450 enzymes in the metabolic activation of the  
446 colon carcinogen azoxymethane in mice. Chem Res Toxicol. 2014; 27:  
447 656–62. doi:10.1021/tx4004769
- 448 14. Bustin SA, Benes V, Garson JA, Hellemans J, Huggett J, Kubista M, et

- 449 al. The MIQE Guidelines: Minimum Information for Publication of  
450 Quantitative Real-Time PCR Experiments. Clin Chem. 2009; 55: 611–  
451 622. doi:10.1373/clinchem.2008.112797
- 452 15. Derveaux S, Vandesompele J, Hellemans J. How to do successful gene  
453 expression analysis using real-time PCR. Methods 2010; 50: 227–230.  
454 doi:10.1016/j.ymeth.2009.11.001
- 455 16. Zerbino DR, Achuthan P, Akanni W, Amode MR, Barrell D, Bhai J, et al.  
456 Ensembl 2018. Nucleic Acids Res. 2018; 46: D754–D761.  
457 doi:10.1093/nar/gkx1098
- 458 17. Untergasser A, Cutcutache I, Koressaar T, Ye J, Faircloth BC, Remm  
459 M, et al. Primer3--new capabilities and interfaces. Nucleic Acids Res.  
460 2012; 40: e115. doi:10.1093/nar/gks596
- 461 18. Thornton B, Basu C. Real-time PCR (qPCR) primer design using free  
462 online software. Biochem Mol Biol Educ. 2011; 39: 145–54.  
463 doi:10.1002/bmb.20461
- 464 19. Owczarzy R, Tataurov A V, Wu Y, Manthey JA, McQuisten KA,  
465 Almazrazi HG, et al. IDT SciTools: a suite for analysis and design of  
466 nucleic acid oligomers. Nucleic Acids Res. 2008; 36: W163-W169.  
467 doi:10.1093/nar/gkn198
- 468 20. Rhead B, Karolchik D, Kuhn RM, Hinrichs AS, Zweig AS, Fujita PA, et  
469 al. The UCSC Genome Browser database: update 2010. Nucleic Acids  
470 Res. 2010; 38: D613–D619. doi:10.1093/nar/gkp939
- 471 21. Johnson M, Zaretskaya I, Raytselis Y, Merezuk Y, McGinnis S,  
472 Madden TL. NCBI BLAST: a better web interface. Nucleic Acids Res.  
473 2008; 36: W5–W9. doi:10.1093/nar/gkn201

- 474 22. Taylor S, Wakem M, Dijkman G, Alsarraj M, Nguyen M. A practical  
475 approach to RT-qPCR—Publishing data that conform to the MIQE  
476 guidelines. *Methods* 2010; 50: S1–S5. doi:10.1016/j.ymeth.2010.01.005
- 477 23. Kennedy S, Oswald N. PCR troubleshooting and optimization: the  
478 essential guide. 1<sup>st</sup> ed. Caister Academic Press; 2011.
- 479 24. Sun M, Lu M-X, Tang X-T, Du Y-Z. Exploring Valid Reference Genes for  
480 Quantitative Real-Time PCR Analysis in *Sesamia inferens* (Lepidoptera:  
481 Noctuidae). Zhang Y, editor. *PLoS One* 2015; 10: e0115979.  
482 doi:10.1371/journal.pone.0115979
- 483 25. van Rijn SJ, Riemers FM, van den Heuvel D, Wolfswinkel J, Hofland L,  
484 Meij BP, et al. Expression Stability of Reference Genes for Quantitative  
485 RT-PCR of Healthy and Diseased Pituitary Tissue Samples Varies  
486 Between Humans, Mice, and Dogs. *Mol Neurobiol.* 2014; 49: 893–899.  
487 doi:10.1007/s12035-013-8567-7
- 488 26. Dheda K, Huggett JF, Bustin SA, Johnson MA, Rook G, Zumla A.  
489 Validation of housekeeping genes for normalizing RNA expression in  
490 real-time PCR. *Biotechniques* 2004; 37: 112–119.
- 491 27. Jacob F, Guertler R, Naim S, Nixdorf S, Fedier A, Hacker NF, et al.  
492 Careful Selection of Reference Genes Is Required for Reliable  
493 Performance of RT-qPCR in human normal and cancer cell lines. *PLoS*  
494 *One* 2013; 8: e59180. doi:10.1371/journal.pone.0059180
- 495 28. Dheda K, Huggett JF, Chang JS, Kim LU, Bustin SA, Johnson MA, et al.  
496 The implications of using an inappropriate reference gene for real-time  
497 reverse transcription PCR data normalization. *Anal Biochem.* 2005; 344:  
498 141–143. doi:10.1016/J.AB.2005.05.022

- 499 29. Hellemans J, Mortier G, De Paepe A, Speleman F, Vandesompele J.  
500 qBase relative quantification framework and software for management  
501 and automated analysis of real-time quantitative PCR data. *Genome*  
502 *Biol. BioMed Central* 2007; 8: R19. doi:10.1186/gb-2007-8-2-r19
- 503 30. Xie F, Xiao P, Chen D, Xu L, Zhang B. miRDeepFinder: a miRNA  
504 analysis tool for deep sequencing of plant small RNAs. *Plant Mol Biol.*  
505 2012; 80: 75–84. doi:10.1007/s11103-012-9885-2
- 506 31. Zucchini N, de Sousa G, Bailly-Maitre B, Gugenheim J, Bars R, Lemaire  
507 G, et al. Regulation of Bcl-2 and Bcl-xL anti-apoptotic protein  
508 expression by nuclear receptor PXR in primary cultures of human and  
509 rat hepatocytes. *Biochim Biophys Acta.* 2005; 1745: 48–58.  
510 doi:10.1016/j.bbamcr.2005.02.005
- 511 32. Tan BL, Norhaizan ME, Huynh K, Yeap SK, Hazilawati H, Roselina K.  
512 Brewers' rice modulates oxidative stress in azoxymethane-mediated  
513 colon carcinogenesis in rats. *World J Gastroenterol.* 2015; 21: 8826–35.  
514 doi:10.3748/wjg.v21.i29.8826
- 515 33. Wu K, Li S, Bodhinathan K, Meyers C, Chen W, Campbell-Thompson  
516 M, et al. Enhanced expression of Pctk1, Tcf12 and Ccnd1 in  
517 hippocampus of rats: Impact on cognitive function, synaptic plasticity  
518 and pathology. *Neurobiol Learn Mem.* 2012; 97: 69–80.  
519 doi:10.1016/j.nlm.2011.09.006
- 520 34. Peinnequin A, Mouret C, Birot O, Alonso A, Mathieu J, Clarençon D, et  
521 al. Rat pro-inflammatory cytokine and cytokine related mRNA  
522 quantification by real-time polymerase chain reaction using SYBR  
523 green. *BMC Immunol.* 2004; 5: 3. doi:10.1186/1471-2172-5-3

35. Nergiz I, Bařeskioglu B, Yenilmez A, Erkasap N, Can C, Tosun M. Effects of rotenone on inducible nitric oxide synthase and cyclooxygenase-2 mRNA levels detected by real-time PCR in a rat bladder ischemia/reperfusion model. *Exp Ther Med*. 2012; 4: 344–348. doi:10.3892/etm.2012.596
36. Kensara OA, El-Shemi AG, Mohamed AM, Refaat B, Idris S, Ahmad J. Thymoquinone subdues tumor growth and potentiates the chemopreventive effect of 5-fluorouracil on the early stages of colorectal carcinogenesis in rats. *Drug Des Devel Ther*. 2016; 10: 2239–53. doi:10.2147/DDDT.S109721
37. Li H-B, Qin D-N, Cheng K, Su Q, Miao Y-W, Guo J, et al. Central blockade of salusin  $\beta$  attenuates hypertension and hypothalamic inflammation in spontaneously hypertensive rats. *Sci. Rep*. 2015; 5: 11162. doi:10.1038/srep11162

## Supporting information captions

**S1 Appendix.** LLARS study flowchart.

**S1 Table.** List of the primer pairs not validated successfully.



**A**

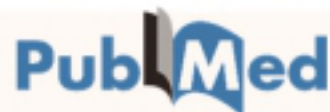

Select genes described in DMH/AOM rodent CRC models

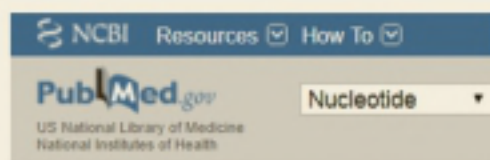

Obtain Fasta sequences for each accession number selected

Crosstalk

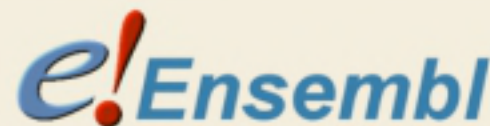

Take into account all the transcripts described for each gene.

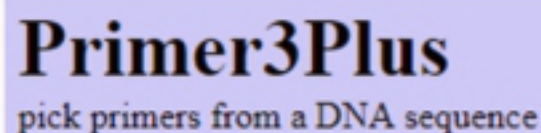

Pick primers from the homologous region selected in the previous step (if necessary)

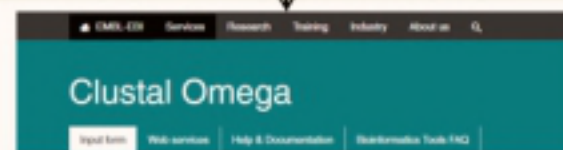

If necessary, search for the homologue regions among all possible transcripts

Checking their aptitude

Secondary primer structures (hairpin, self-dimer and cross-dimer)

OligoAnalyzer 3.1

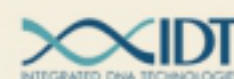

Secondary amplicon structures

UNAFold

*In silico* specificity

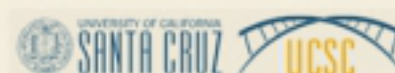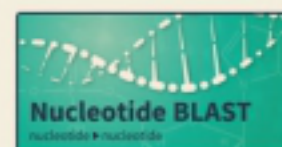

bioRxiv preprint doi: <https://doi.org/10.1101/365353>; this version posted July 9, 2018. The copyright holder for this preprint (which was not certified by peer review) is the author/funder, who has granted bioRxiv a license to display the preprint in perpetuity. It is made available under aCC-BY 4.0 International license.

**B**

Primer pair selected

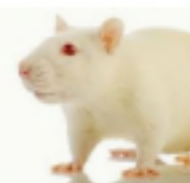

Wistar rat colon cDNA obtained

Check its specificity through conventional PCR + agarose gel. Optimization annealing temperature (if necessary)

No or unspecific bands

Go to Part 1 and select another primers pair

Unique band

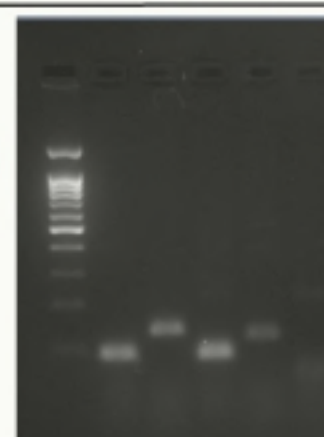

qPCR assays assessed for MIQE guideline premises: efficiency, linearity, specificity (unique and clear melt curve)

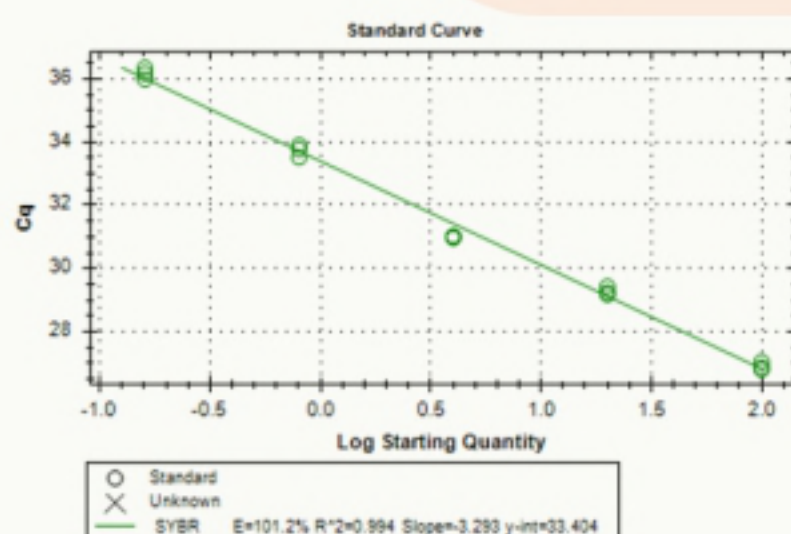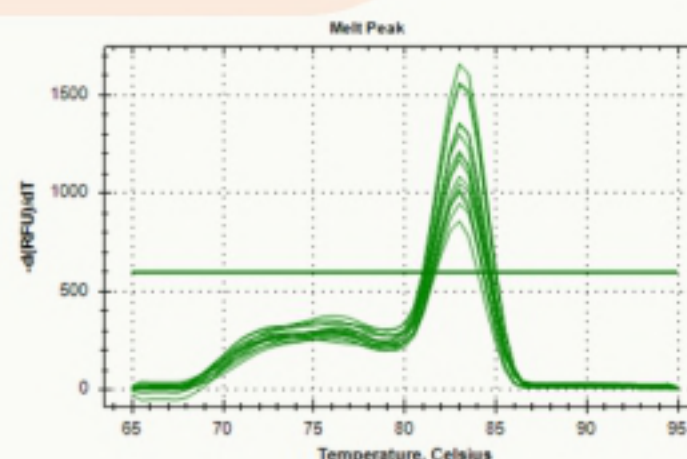

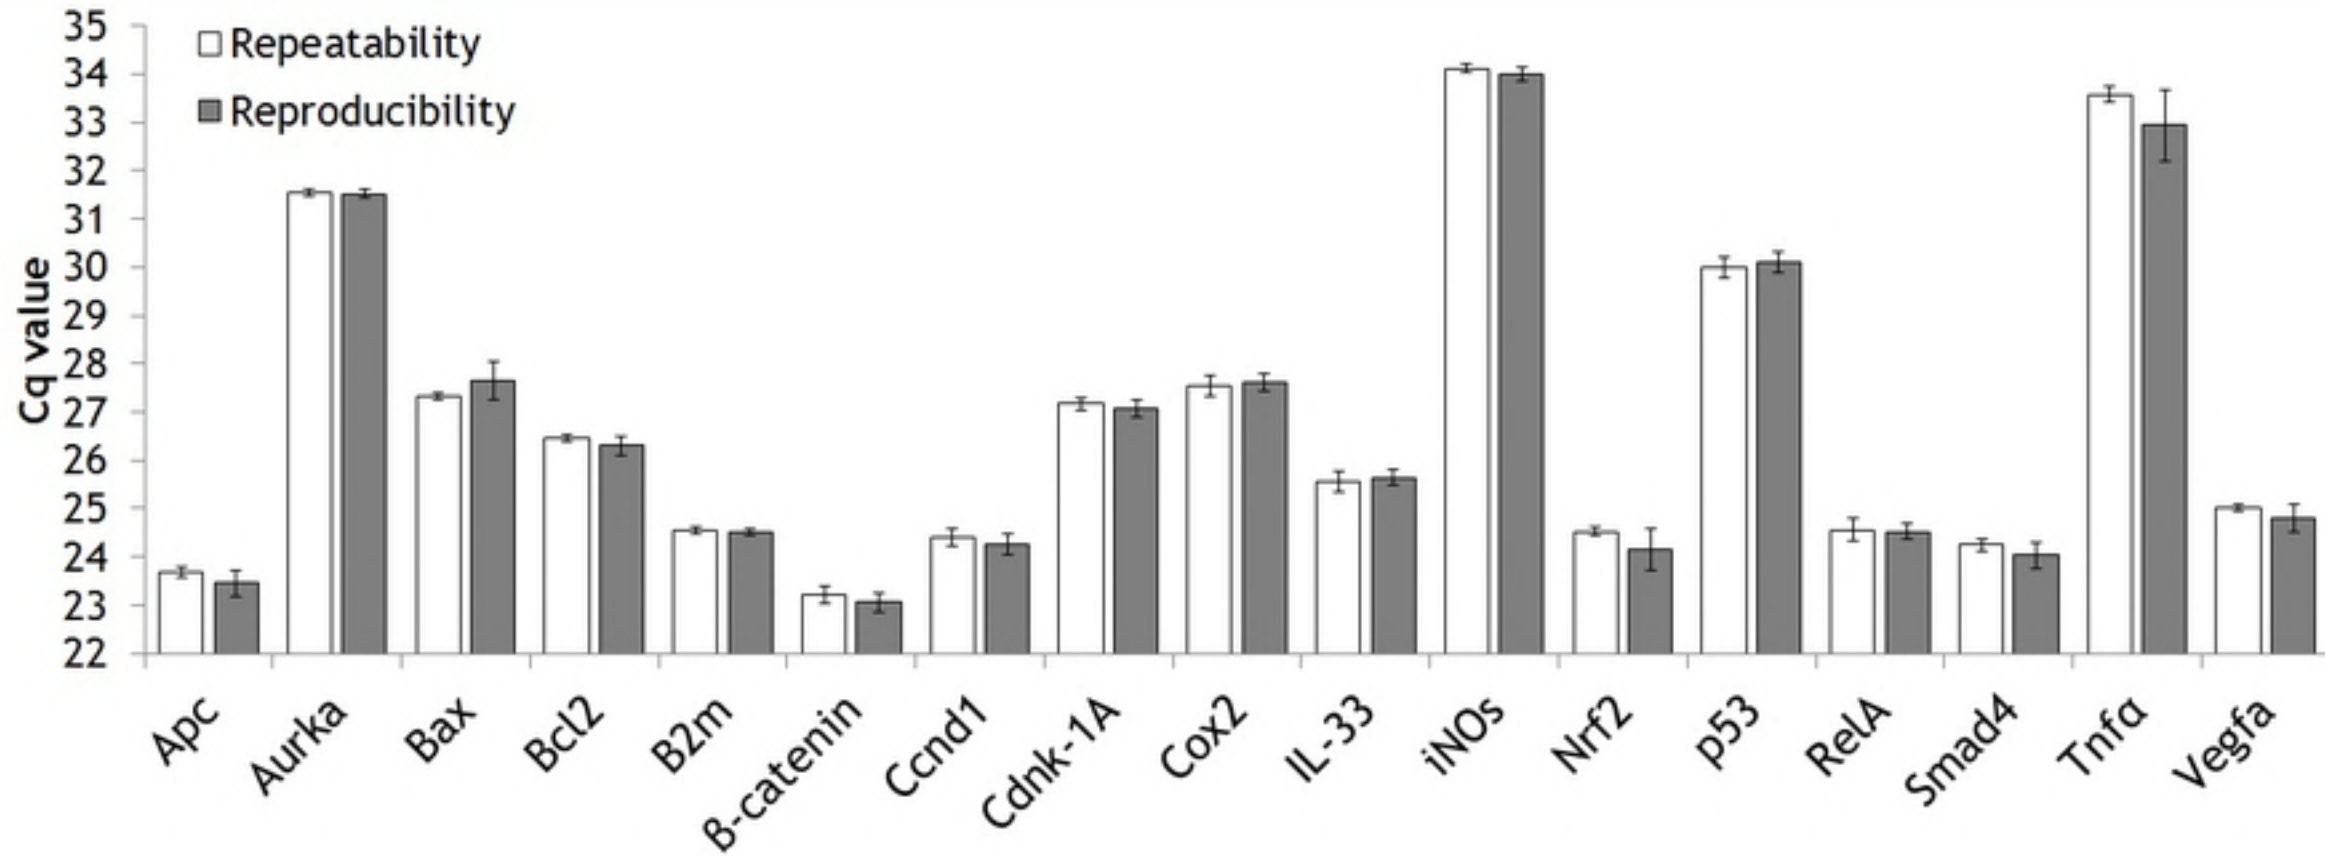

Source: https://www.biorxiv.org/content/10.1101/365353v1.full.pdf
